# Supplementary material for: Electrochemical Determination of 4-Bromophenoxyacetic Acid Based on CeO2/eGr Composite
Source: MDPI journal article supplement (doi:10.3390/bios12090760), 2022-09-15
Supplement: s1 [file s1]

# Electrochemical Determination of 4-Bromophenoxyacetic Acid Based on eGr/CeO<sub>2</sub> Composite

Haijun Du <sup>1,†</sup>, Yan Zhang <sup>1,†</sup>, Xin Wang <sup>1,2</sup>, Huali Hu <sup>1</sup>, Jixing Ai <sup>1</sup>, Huanxi Zhou <sup>2,3</sup>, Xia Yan <sup>3</sup>, Yang Yang <sup>2,\*</sup> and Zhiwei Lu <sup>4,\*</sup>

<sup>1</sup> School of Chemical Engineering, Guizhou Minzu University, Guiyang 550025, China

<sup>2</sup> School of Materials Science and Engineering, Guizhou Minzu University, Guiyang 550025, China

<sup>3</sup> School of Mechatronics Engineering, Guizhou Minzu University, Guiyang 550025, China

<sup>4</sup> College of Science, Sichuan Agricultural University, Ya'an 625014, China

\* Correspondence: y.yang@gzmu.edu.cn (Y.Y.); zhiweilu@sicau.edu.cn (Z.L.)

† These authors contributed equally to this work.

## Supplementary materials

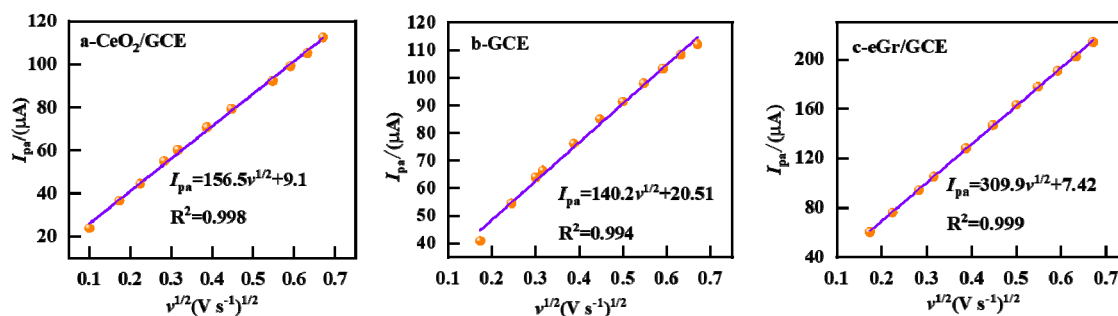

**Figure S1.** The plot of peak currents vs.  $v^{1/2}$  for (a) CeO<sub>2</sub>/GCE, (b) GCE, (c) eGr/GCE in the presence of 5 mM [Fe(CN)<sub>6</sub>]<sup>3-/4-</sup> solution in aqueous of 0.1 M KCl.

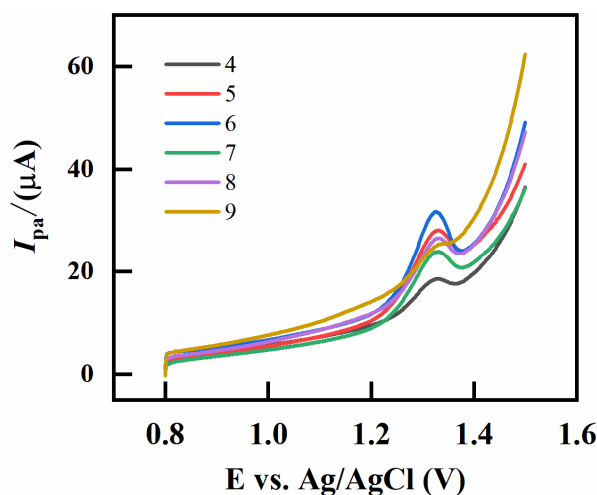

**Figure S2.** LSVs response of 10  $\mu$ M 4-BAP to different volumes of composite in PBS solution (pH=3).

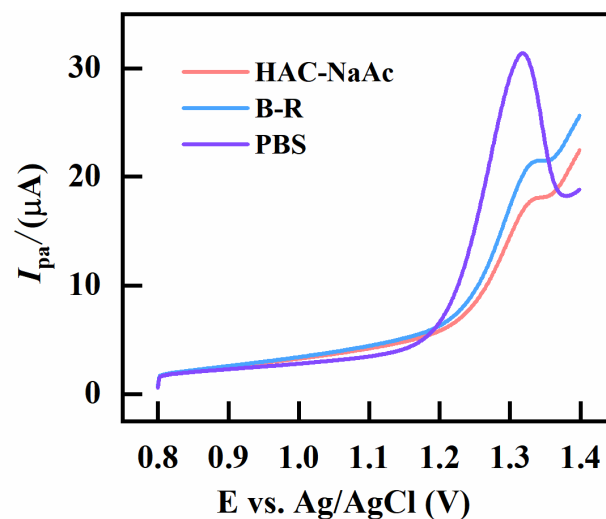

**Figure S3.** LSVs for 4-BPA detection in different buffer solutions.

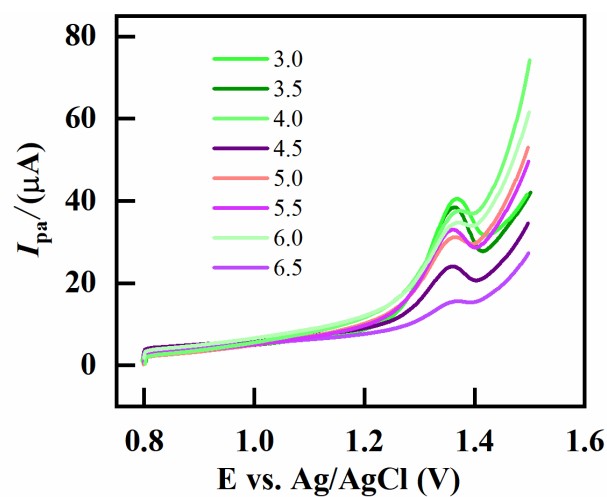

**Figure S4.** Influence of pH on 4-BPA detection in 0.1 M PBS solution.

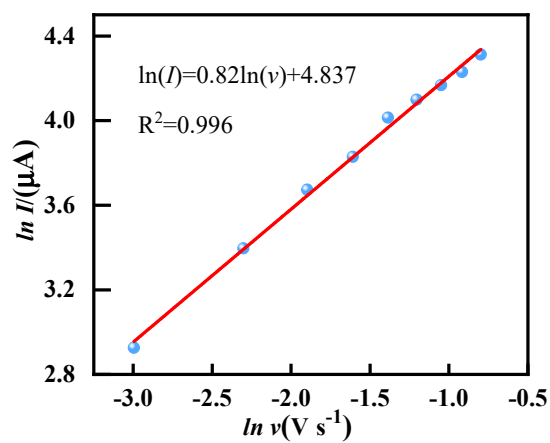

**Figure S5.** The plots of  $\ln I$  vs.  $\ln v$  for 20  $\mu M$  4-BPA at 0.05, 0.1, 0.15, 0.2, 0.25, 0.3, 0.35, 0.4, 0.45  $V s^{-1}$ .

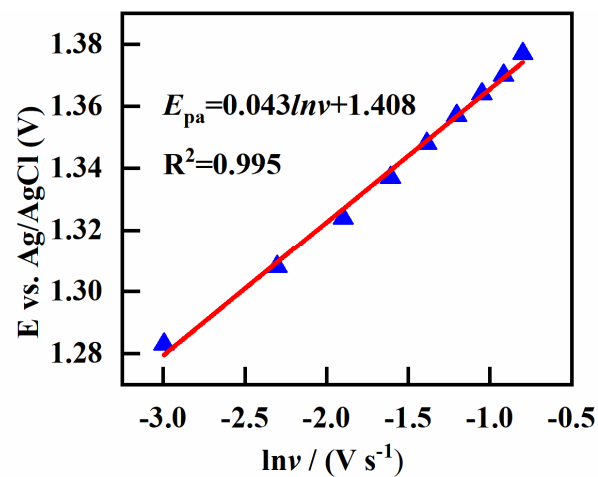

**Figure S6.** The plots of  $E_{pa}$  vs.  $\ln v$  for 20  $\mu\text{M}$  4-BPA at 0.05, 0.1, 0.15, 0.2, 0.25, 0.3, 0.35, 0.4, 0.45  $\text{V s}^{-1}$ .

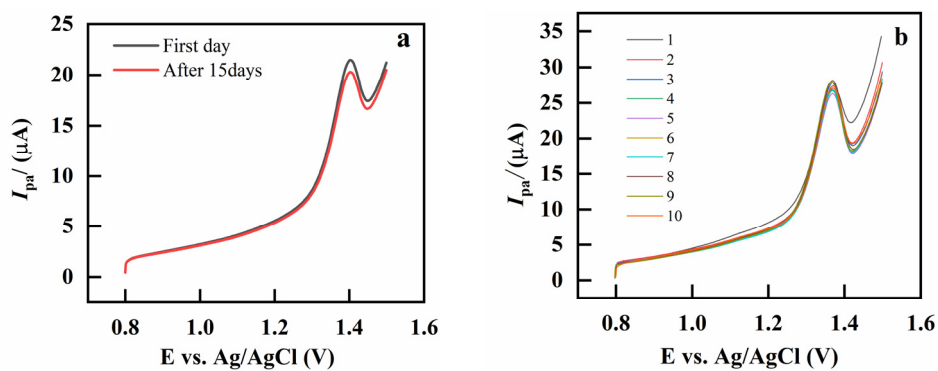

**Figure S7.** (a) The LSVs of the  $\text{CeO}_2/\text{eGr}/\text{GCE}$  in 0.1 M PBS (pH = 3) at first day and after 15 days. (b) 10 continuous measurements of 4-BPA on  $\text{CeO}_2/\text{eGr}/\text{GCE}$ .
